# Supplementary material for: Accuracy of eye position for saccades and smooth pursuit
Source: PubMed Central journal article supplement — J Vis. 2016 Dec 22;16(15):23. doi: 10.1167/16.15.23 (PMC5213993; doi:10.1167/16.15.23), 2016-12-22
Supplement: JOV-05441-2016-s02.pdf [file JOV-05441-2016-s02.pdf]

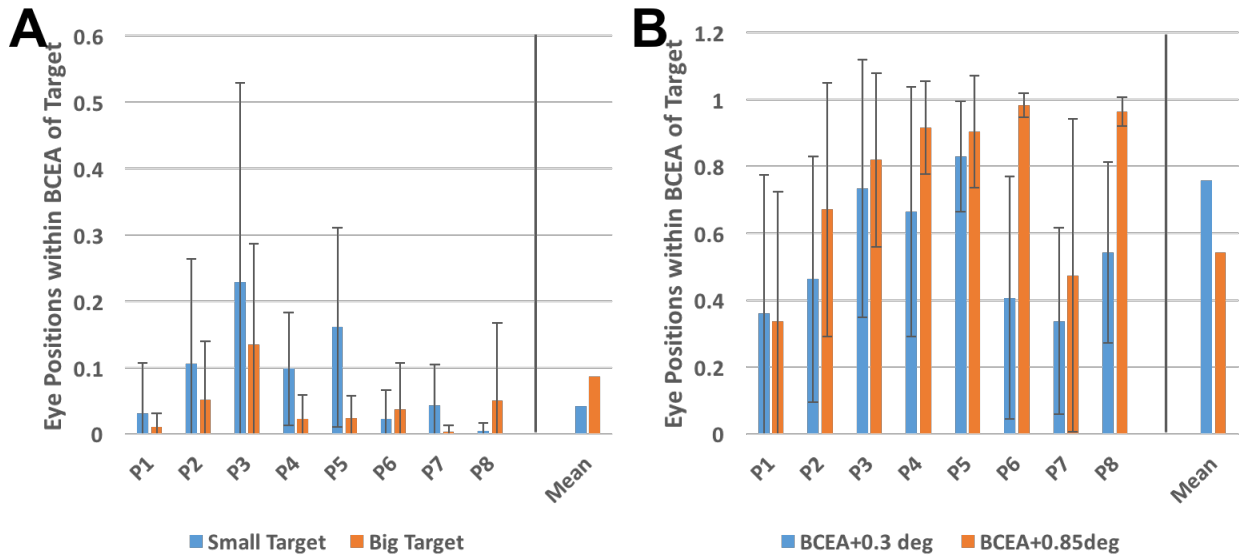

**Figure S1.** Proportion of eye positions on target center, given BCEA (A) or within target boundary (B) as in Figure 4. Note change in axes scales between A & B. Blue bars are data for small ( $0.6^\circ$ ) target trials and orange bars are data for big ( $1.7^\circ$ ) target trials. Error bars are one standard deviation of the mean. Group means are shown as the right-most bars for each plot.
