# Supplementary material for: Accuracy of eye position for saccades and smooth pursuit
Source: PubMed Central journal article supplement — J Vis. 2016 Dec 22;16(15):23. doi: 10.1167/16.15.23 (PMC5213993; doi:10.1167/16.15.23), 2016-12-22
Supplement: JOV-05441-2016-s03.pdf [file JOV-05441-2016-s03.pdf]

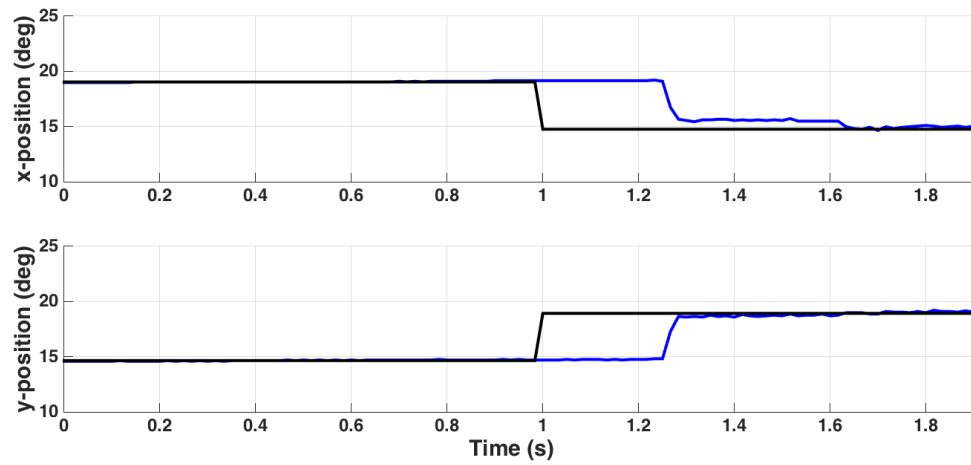

**Figure S2. Sample saccade trial (P1).** Black traces represent target position and blue traces are the corresponding eye position ( $1.7^\circ$  target,  $315^\circ$  trajectory).
