# Supplementary material for: Accuracy of eye position for saccades and smooth pursuit
Source: PubMed Central journal article supplement — J Vis. 2016 Dec 22;16(15):23. doi: 10.1167/16.15.23 (PMC5213993; doi:10.1167/16.15.23), 2016-12-22
Supplement: JOV-05441-2016-s04.pdf [file JOV-05441-2016-s04.pdf]

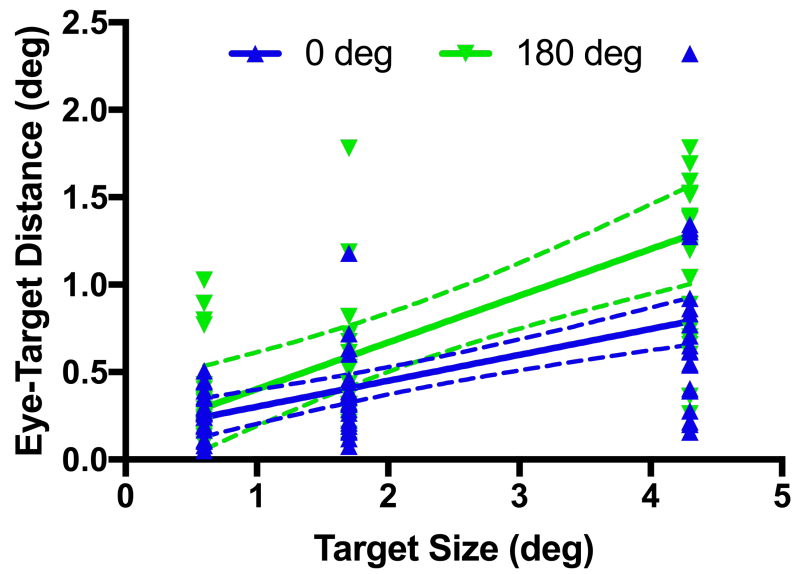

**Figure S3.** Distribution of eye-target distances for participant P1 for smooth pursuit trials separated by target direction (blue: 0°; green: 180°). Each symbol represents an individual trial. Solid lines are the linear regression fits. Dashed lines indicate the corresponding 95% confidence intervals for the regressions.
